# Supplementary material
Source: ML conference proceedings conference paper supplement (https://proceedings.mlr.press/v119/nock20a.html)
Supplement: Supplementary file [file nock20a-supp.pdf]

# Supervised Learning: No Loss No Cry — Supplementary Material —

## **Abstract**

This is the Supplementary Material to Paper "Supervised Learning: No Loss No Cry" by R. Nock and A.-K. Menon. To differentiate with the numberings in the main file, the numbering of Theorems is letter-based (A, B, ...).

# I Table of contents

|                                  |       |
|----------------------------------|-------|
| Factsheet on Bregman divergences | Pg 3  |
| Proof of Theorem 1               | Pg 3  |
| Proof of Theorem 5               | Pg 5  |
| Proof of Corollary 6             | Pg 18 |
| Proof of Lemma 7                 | Pg 20 |

## II Factsheet on Bregman divergences

We summarize in this section the results we use (both in the main file and in this SI) related to Bregman divergence with convex generator  $F$ ,

$$D_F(z\|z') \doteq F(z) - F(z') - (z - z')F'(z'), \quad (1)$$

where we assume for the sake of simplicity that  $F$  is twice differentiable.

▷ **General properties** –  $D_F$  is always non-negative, convex in its left parameter, but not always in its right parameter. Only the divergences corresponding to  $F(z) \propto z^2$  are symmetric (Boissonnat et al., 2010).

▷  $D_F$  is locally proportional to the square loss – assuming second order differentiability, we have (Nock et al., 2008):

$$\forall z, z', \exists c \in [z \wedge z', z \vee z'] : D_F(z\|z') = \frac{F''(c)}{2} \cdot (z - z')^2. \quad (2)$$

▷ **Bregman triangle equality** – also called the three points property (Nock et al., 2008, 2016),

$$\forall z, z', z'', D_F(z\|z'') = D_F(z\|z') + D_F(z'\|z'') + (F'(z'') - F'(z'))(z' - z). \quad (3)$$

▷ **Invariance to affine terms** – for any affine function  $G(z)$  (Boissonnat et al., 2010),

$$\forall z, z', D_{F+G}(z\|z') = D_F(z\|z'). \quad (4)$$

▷ **Dual symmetry** – letting  $F^*$  denote the convex conjugate of  $F$ , we have (Nock et al., 2016),

$$\forall z, z', D_F(z\|z') = D_{F^*}(F'(z')\|F'(z)). \quad (5)$$

▷ **The right population minimizer is the mean** – we have (Banerjee et al., 2004),

$$\arg \min_z \mathbb{E}_Z[D_F(Z\|z)] = \mathbb{E}_Z[Z] \doteq \mu(Z). \quad (6)$$

▷ **Bregman information** – the Bregman information of random variable  $Z$ , defined as  $I_F(Z) \doteq \min_z \mathbb{E}_Z[D_F(Z\|z)]$ , satisfies (Banerjee et al., 2004)

$$I_F(Z) = \mathbb{E}_Z[D_F(Z\|\mu(Z))]. \quad (7)$$

## III Proof of Theorem 1

( $\Rightarrow$ ) The proof assumes basic knowledge about proper losses as in Reid & Williamson (2010) (and references therein) for example. It comes from Reid & Williamson (2010, Theorem 1, Corollary 3) and Shuford et al. (1966) that a differentiable function defines a proper loss iff there exists a Riemann integrable (eventually improper in the integrability sense) function  $w : (0, 1) \rightarrow \mathbb{R}_+$  such that:

$$w(c) = \frac{\ell'_{-1}(c)}{c} = -\frac{\ell'_1(c)}{1-c}, \forall c \in (0, 1). \quad (8)$$

To simplify notations, we slightly abuse notations and let  $\underline{L}'' \doteq -w$  and define  $\underline{L}'(u) \doteq \int_a^u \underline{L}''(z)dz$  for some adequately chosen constant  $a$  (for example,  $a = 1/2$  for symmetric proper canonical losses Nock & Nielsen (2009, 2008)). We denote such a representation of loss functions their integral representation (Reid & Williamson, 2010, eq. (5)), as it gives:

$$\ell_1(c) = \int_c^1 -(1-u)\underline{L}''(u)du, \quad (9)$$

from which we derive by integrating by parts,

$$\begin{aligned} \ell_1(c) &= -[(1-u)\underline{L}'(u)]_c^1 - \int_c^1 \underline{L}'(u)du \\ &= (1-c)\underline{L}'(c) - \underline{L}(1) + \underline{L}(c) \end{aligned} \quad (10)$$

$$= (-\underline{L})(1) - (-\underline{L})(c) - (1-c)(-\underline{L})'(c) \quad (11)$$

$$= D_{-\underline{L}}(1||c), \quad (12)$$

Where  $D_{-\underline{L}}$  is the Bregman divergence with generator  $-\underline{L}$  (we remind that the conditional Bayes risk of a proper loss is concave (Reid & Williamson, 2010, Section 3.2)). We get similarly for the partial loss  $\ell_{-1}$  (Reid & Williamson, 2010, eq. (5)):

$$\begin{aligned} \ell_{-1}(c) &= -\int_0^c u\underline{L}''(u)du \\ &= -[u\underline{L}'(u)]_0^c + \int_0^c \underline{L}'(u)du \\ &= -c\underline{L}'(c) + \underline{L}(c) - \underline{L}(0) \end{aligned} \quad (13)$$

$$= (-\underline{L})(0) - (-\underline{L})(c) - (0-c)(-\underline{L})'(c) \quad (14)$$

$$= D_{-\underline{L}}(0||c). \quad (15)$$

We now replace  $c$  by the inverse of the link chosen,  $\psi$ , and we get for any proper composite loss:

$$\begin{aligned} \ell(y^*, z) &\doteq \mathbb{I}[y^* = 1] \cdot \ell_1(\psi^{-1}(z)) + \mathbb{I}[y^* = -1] \cdot \ell_{-1}(\psi^{-1}(z)) \\ &= D_{-\underline{L}}(y||\psi^{-1}(z)), \end{aligned} \quad (16)$$

as claimed for the implication  $\Rightarrow$ . The identity

$$D_{-\underline{L}}(y||\psi^{-1}(z)) = D_{(-\underline{L})^*}(-\underline{L}' \circ \psi^{-1}(z)||-\underline{L}'(y)) \quad (17)$$

follows from the dual symmetry property of Bregman divergences (Boissonnat et al., 2010; Nock et al., 2016).

( $\Leftarrow$ ) Let  $\ell(y^*, z) \doteq D_{-F}(y||g^{-1}(z))$ , some Bregman divergence, where  $g : [0, 1] \rightarrow \mathbb{R}$  is invertible. Let  $\ell_p(y^*, c) : \mathcal{Y} \times [0, 1] \rightarrow \overline{\mathbb{R}}$  defined by  $\ell_p(y^*, c) \doteq \ell(y^*, g(c))$ . We know that the right population minimizer of any Bregman divergence is the expectation (Banerjee et al., 2004; Nock et al., 2016), so  $\pi \in \arg \inf_u \mathbb{E}_{Y \sim \pi} \ell_p(Y, u)$ ,  $\forall \pi \in [0, 1]$  and  $\ell_p$  is proper. Therefore  $\ell$  is proper composite since  $g$  is invertible. The conditional Bayes risk of  $\ell_p$  is therefore by definition:

$$\underline{L}(\pi) \doteq \mathbb{E}_{Y \sim \pi} \ell_p(Y, \pi) \quad (18)$$

$$= F(\pi) + G(\pi) \quad (19)$$

where  $G(\pi) \doteq -\pi F(1) - (1 - \pi)F(0)$  is affine. Since a Bregman divergence is invariant by addition of an affine term to its generator (4), we get

$$\begin{aligned}\ell_p(y^*, c) &= D_{-F}(y||c) & (20) \\ &= D_{-\underline{L}}(y||c). & (21)\end{aligned}$$

We now check that if  $g = -F'$  then  $\ell$  is proper canonical. It comes from (19)  $(-F')^{-1}(z) = (-\underline{L}')^{-1}(z + K)$  where  $K \doteq -(F(1) - F(0))$  is a constant, which is still the inverse of the canonical link since it is defined up to multiplication or addition by a scalar (Buja et al., 2005). Hence, if  $g = -F'$  then  $\ell(y^*, z)$  is proper canonical. Otherwise as previously argued it is proper composite with link  $g$  in the more general case. This completes the proof for the implication  $\Leftarrow$ , and ends the proof of Theorem 1.

**Remark:** symmetric proper canonical losses (such as the logistic, square or Matsushita losses) admit  $\underline{L}(0) = \underline{L}(1)$  Nock & Nielsen (2009, 2008). Hence (19) enforces  $\forall \pi \in [0, 1]$

$$\pi(F(0) - F(1)) = \underline{L}(0) = \underline{L}(1) = (1 - \pi)(F(1) - F(0)), \quad (22)$$

resulting in  $F(1) = F(0)$  and therefore enforcing the constraint  $K = 0$  above.

## IV Proof of Theorem 5

### IV.1 Helper results about BREGMANTRON and FIT

To prove the Theorem, we first show several simple helper results. The first is a simple consequence of the design of  $u_t$ . We prove it for the sake of completeness.

**Lemma A** *Let  $u_t$  be the function output by FIT in BREGMANTRON. Let  $z_m \doteq u_t^{-1}(0)$  and  $z_M \doteq u_t^{-1}(1)$ . Let  $U_t$  be defined as in (14) (main body, with  $u \leftarrow u_t$ ). The following holds true on  $u_t$*

$$n_{t-1} \cdot (z - z') \leq u_t(z) - u_t(z') \leq N_{t-1} \cdot (z - z') \quad , \quad (23)$$

$$\frac{1}{N_{t-1}} \cdot (p - p') \leq u_t^{-1}(p) - u_t^{-1}(p') \leq \frac{1}{n_{t-1}} \cdot (p - p') \quad , \quad (24)$$

$\forall z_m \leq z' \leq z \leq z_M, \forall 0 \leq p' \leq p \leq 1$ , and the following holds true on  $U_t$ :

$$\frac{(p - p')^2}{2N_{t-1}} \leq D_{U_t^*}(p||p') \leq \frac{(p - p')^2}{2n_{t-1}}. \quad (25)$$

**Proof** We show the right-hand side of ineq. (23). The left hand side of (23) follows by symmetry and ineq (24) follow after a variable change from ineq (23). The proof is a rewriting of the mean-value Theorem for subdifferentials: consider for example the case  $u_t(b) - u_t(a) = N'(b - a)$  with  $N' > N_{t-1}$  for some  $z_m < a < b < z_M$ . Let

$$v(z) \doteq u_t(z) - u_t(b) + N'(b - z) \quad , \quad (26)$$

and since  $v(a) = v(b) = 0$ , let  $z_* \doteq \arg \min_z v(z)$ , assuming wlog that the min exists. Then  $v(z) \geq v(z_*)$ , and equivalently  $u_t(z) - u_t(b) + N'(b - z) \geq u_t(z_*) - u_t(b) + N'(b - z_*)$  ( $\forall z \in [a, b]$ ),

which, after reorganising, gives  $u_t(z) \geq u_t(z_*) + N'(z - z_*)$ , implying  $N' \in \partial u_t(z_*)$ . Pick now  $a \leq z'_* < z_* < z''_* \leq b$  that are linked to  $z_*$  by a line segment in  $u_t$ . At least one of the two segments has slope  $\geq N'$ , which is impossible since  $N' > N_{t-1}$  and yields a contradiction. The case  $a = z_m$  xor  $b = z_M$  reduces to a single segment with slope  $\geq N'$ , also impossible.

We now show (25). Let

$$V(p) \doteq U_t^*(b) - U_t^*(p) - (b-p)u_t^{-1}(z) - A(b-p)^2, \quad (27)$$

(remind that  $(U_t^*)' = u_t^{-1}$ ) where  $A$  is chosen so that  $V(a) = 0$ , which implies<sup>1</sup> since  $V(b) = 0$  that  $\exists c \in (a, b), 0 \in \partial V(c)$ . We have  $\partial V(c) \ni -(b-c)c' - 2A(c-b)$  for any  $c' \in \partial u_t^{-1}(c)$ , implying  $A = c'/2$  for some  $c' \in \partial u_t^{-1}(c)$ . Solving for  $V(a) = 0$  yields  $D_{U_t^*}(b||a) = (c'/2)(b-a)^2$  for some  $c' \in \partial u_t^{-1}$  and since  $\text{Im} \partial u_t^{-1} \subset [1/N_{t-1}, 1/n_{t-1}]$  from (24), we get

$$\frac{(b-a)^2}{2N_{t-1}} \leq D_{U_t^*}(b||a) \leq \frac{(b-a)^2}{2n_{t-1}}, \quad (28)$$

as claimed. ■

Note that we indeed have  $\hat{y}_1 \doteq u_{t+1}(\mathbf{w}_{t+1}^\top \mathbf{x}_1)$  by the design of Step 4 in BREGMANTRON. The second result we need is a direct consequence of Step 3 in BREGMANTRON.

**Lemma B** *The following holds for any  $t \geq 1, i \in [m]$ ,*

$$u_{t+1}(\mathbf{w}_{t+1}^\top \mathbf{x}_i) \in u_t(\mathbf{w}_{t+1}^\top \mathbf{x}_i) \cdot \left[ \min \left\{ 1 - \beta_t, \frac{n_t}{N_t} \right\}, \max \left\{ 1 + \alpha_t, \frac{N_t}{n_t} \right\} \right], \quad (29)$$

where  $\alpha_t, \beta_t \geq 0$  are the stability property parameters at the current iteration of BREGMANTRON, as defined in Definition 3 (main file).

**Proof** We prove the upperbound in (29) by induction. Assuming the property holds for  $\mathbf{x}_i$  and considering  $\mathbf{x}_{i+1}$  (recall that indexes are ordered in increasing value of  $\mathbf{w}_{t+1}^\top \mathbf{x}_i$ , see Step 2 in BREGMANTRON), we obtain

$$u_{t+1}(\mathbf{w}_{t+1}^\top \mathbf{x}_{i+1}) \leq u_{t+1}(\mathbf{w}_{t+1}^\top \mathbf{x}_i) + N_t \mathbf{w}_{t+1}^\top (\mathbf{x}_{i+1} - \mathbf{x}_i) \quad (30)$$

$$\leq u_{t+1}(\mathbf{w}_{t+1}^\top \mathbf{x}_i) + \frac{N_t}{n_t} \cdot (u_t(\mathbf{w}_{t+1}^\top \mathbf{x}_{i+1}) - u_t(\mathbf{w}_{t+1}^\top \mathbf{x}_i)) \quad (31)$$

$$= \frac{N_t}{n_t} u_t(\mathbf{w}_{t+1}^\top \mathbf{x}_{i+1}) + u_{t+1}(\mathbf{w}_{t+1}^\top \mathbf{x}_i) - \frac{N_t}{n_t} \cdot u_t(\mathbf{w}_{t+1}^\top \mathbf{x}_i). \quad (32)$$

The first inequality comes from the right interval constraint in problem (10) applied to  $u_{t+1}$ , ineq. (31) comes from Lemma A applied to  $u_t$ . We now have two cases.

**Case 1** If  $N_t/n_t > 1 + \alpha_t$ , using the induction hypothesis (29) yields  $u_{t+1}(\mathbf{w}_{t+1}^\top \mathbf{x}_i) \leq (N_t/n_t) \cdot u_t(\mathbf{w}_{t+1}^\top \mathbf{x}_i)$  and so (32) becomes

$$\begin{aligned} u_{t+1}(\mathbf{w}_{t+1}^\top \mathbf{x}_{i+1}) &\leq \frac{N_t}{n_t} u_t(\mathbf{w}_{t+1}^\top \mathbf{x}_{i+1}) + \frac{N_t}{n_t} u_t(\mathbf{w}_{t+1}^\top \mathbf{x}_i) - \frac{N_t}{n_t} u_t(\mathbf{w}_{t+1}^\top \mathbf{x}_i) \\ &= \frac{N_t}{n_t} u_t(\mathbf{w}_{t+1}^\top \mathbf{x}_{i+1}). \end{aligned} \quad (33)$$

---

<sup>1</sup>This is a simple application of Rolle's Theorem to subdifferentials.

**Case 2** If  $N_t/n_t \leq 1 + \alpha_t$ , we have this time from the induction hypothesis  $u_{t+1}(\mathbf{w}_{t+1}^\top \mathbf{x}_i) \leq (1 + \alpha_t) \cdot u_t(\mathbf{w}_{t+1}^\top \mathbf{x}_i)$ , and so we get from (32),

$$\begin{aligned} u_{t+1}(\mathbf{w}_{t+1}^\top \mathbf{x}_{i+1}) &\leq \frac{N_t}{n_t} u_t(\mathbf{w}_{t+1}^\top \mathbf{x}_{i+1}) + \left(1 + \alpha_t - \frac{N_t}{n_t}\right) \cdot u_t(\mathbf{w}_{t+1}^\top \mathbf{x}_i) \\ &\leq \frac{N_t}{n_t} u_t(\mathbf{w}_{t+1}^\top \mathbf{x}_{i+1}) + \left(1 + \alpha_t - \frac{N_t}{n_t}\right) \cdot u_t(\mathbf{w}_{t+1}^\top \mathbf{x}_{i+1}) \end{aligned} \quad (34)$$

$$= (1 + \alpha_t) u_t(\mathbf{w}_{t+1}^\top \mathbf{x}_{i+1}), \quad (35)$$

where (34) holds because  $\mathbf{w}_{t+1}^\top \mathbf{x}_i \leq \mathbf{w}_{t+1}^\top \mathbf{x}_{i+1}$  (by assumption) and  $u_t$  is non-decreasing.

The proof of the lowerbound in (29) follows from the following "symmetric" induction, noting first that the second constraint in problem (10) (main file) implies the base case,  $u_{t+1}(\mathbf{w}_{t+1}^\top \mathbf{x}_1) \geq (1 - \beta_t) u_t(\mathbf{w}_{t+1}^\top \mathbf{x}_1)$ , and then, for the general index  $i > 1$ ,

$$u_{t+1}(\mathbf{w}_{t+1}^\top \mathbf{x}_{i+1}) \geq u_{t+1}(\mathbf{w}_{t+1}^\top \mathbf{x}_i) + n_t \mathbf{w}_{t+1}^\top (\mathbf{x}_{i+1} - \mathbf{x}_i) \quad (36)$$

$$\geq u_{t+1}(\mathbf{w}_{t+1}^\top \mathbf{x}_i) + \frac{n_t}{N_t} \cdot (u_t(\mathbf{w}_{t+1}^\top \mathbf{x}_{i+1}) - u_t(\mathbf{w}_{t+1}^\top \mathbf{x}_i)) \quad (37)$$

$$= \frac{n_t}{N_t} \cdot u_t(\mathbf{w}_{t+1}^\top \mathbf{x}_{i+1}) + u_{t+1}(\mathbf{w}_{t+1}^\top \mathbf{x}_i) - \frac{n_t}{N_t} \cdot u_t(\mathbf{w}_{t+1}^\top \mathbf{x}_i). \quad (38)$$

The first inequality comes from the left interval constraint in problem (10) applied to  $u_{t+1}$ , ineq. (37) comes from Lemma A applied to  $u_t$ . Similarly to the upperbound in (29), we now have two cases.

**Case 1** If  $n_t/N_t \leq 1 - \beta_t$ , using the induction hypothesis (29) yields  $u_{t+1}(\mathbf{w}_{t+1}^\top \mathbf{x}_i) \geq (n_t/N_t) \cdot u_t(\mathbf{w}_{t+1}^\top \mathbf{x}_i)$  and so (38) becomes

$$\begin{aligned} u_{t+1}(\mathbf{w}_{t+1}^\top \mathbf{x}_{i+1}) &\geq \frac{n_t}{N_t} \cdot u_t(\mathbf{w}_{t+1}^\top \mathbf{x}_{i+1}) + \frac{n_t}{N_t} \cdot u_t(\mathbf{w}_{t+1}^\top \mathbf{x}_i) - \frac{n_t}{N_t} \cdot u_t(\mathbf{w}_{t+1}^\top \mathbf{x}_i) \\ &= \frac{n_t}{N_t} \cdot u_t(\mathbf{w}_{t+1}^\top \mathbf{x}_{i+1}). \end{aligned} \quad (39)$$

**Case 2** If  $n_t/N_t > 1 - \beta_t$ , using the induction hypothesis (29) yields  $u_{t+1}(\mathbf{w}_{t+1}^\top \mathbf{x}_i) \geq (1 - \beta_t) \cdot u_t(\mathbf{w}_{t+1}^\top \mathbf{x}_i)$  and so (38) becomes

$$\begin{aligned} u_{t+1}(\mathbf{w}_{t+1}^\top \mathbf{x}_{i+1}) &\geq \frac{n_t}{N_t} \cdot u_t(\mathbf{w}_{t+1}^\top \mathbf{x}_{i+1}) + (1 - \beta_t) \cdot u_t(\mathbf{w}_{t+1}^\top \mathbf{x}_i) - \frac{n_t}{N_t} \cdot u_t(\mathbf{w}_{t+1}^\top \mathbf{x}_i) \\ &\geq \frac{n_t}{N_t} \cdot u_t(\mathbf{w}_{t+1}^\top \mathbf{x}_i) + (1 - \beta_t) \cdot u_t(\mathbf{w}_{t+1}^\top \mathbf{x}_i) - \frac{n_t}{N_t} \cdot u_t(\mathbf{w}_{t+1}^\top \mathbf{x}_i) \end{aligned} \quad (40)$$

$$= (1 - \beta_t) \cdot u_t(\mathbf{w}_{t+1}^\top \mathbf{x}_i). \quad (41)$$

(40) holds because  $\mathbf{w}_{t+1}^\top \mathbf{x}_i \leq \mathbf{w}_{t+1}^\top \mathbf{x}_{i+1}$  (by assumption) and  $u_t$  is non-decreasing. This achieves the proof of Lemma B.  $\blacksquare$

We now analyze the following Bregman loss for  $r, t, t' = 1, 2, \dots$ :

$$\ell_t^r(S, \mathbf{w}_{t'}) \doteq \mathbb{E}_S [D_{U_r^*}(y \| u_t(\mathbf{w}_{t'}^\top \mathbf{x}))] = \mathbb{E}_S [D_{U_r}(u_r^{-1} \circ u_t(\mathbf{w}_{t'}^\top \mathbf{x}) \| u_r^{-1}(y))] , \quad (42)$$

The key to the proof of Theorem 5 is the following Theorem which breaks down the bound that we have to analyze into several parts.

**Theorem C** For any  $t \geq 1$ ,

$$\ell_{t+1}^{t+1}(S, \mathbf{w}_{t+1}) \leq \ell_t^t(S, \mathbf{w}_t) - \mathbb{E}_S[D_{U_t}(\mathbf{w}_t^\top \mathbf{x} \| u_t^{-1} \circ u_{t+1}(\mathbf{w}_{t+1}^\top \mathbf{x}))] - L_{t+1} - Q_{t+1},$$

where

$$L_{t+1} \doteq \mathbb{E}_S[(\mathbf{w}_t^\top \mathbf{x} - u_t^{-1} \circ u_{t+1}(\mathbf{w}_{t+1}^\top \mathbf{x})) \cdot (u_{t+1}(\mathbf{w}_{t+1}^\top \mathbf{x}) - u_t(\mathbf{w}_{t+1}^\top \mathbf{x}))],$$

$$Q_{t+1} \doteq \mathbb{E}_S[(\mathbf{w}_t^\top \mathbf{x} - u_t^{-1} \circ u_{t+1}(\mathbf{w}_{t+1}^\top \mathbf{x})) \cdot (u_t(\mathbf{w}_{t+1}^\top \mathbf{x}) - y)] - \left(\frac{N_{t-1}}{n_t} - 1\right) \cdot \ell_{t+1}^t(S, \mathbf{w}_{t+1}).$$

**Proof** We have the following derivations:

$$\begin{aligned} \ell_t^t(S, \mathbf{w}_t) &= \mathbb{E}_S[D_{U_t^*}(y \| u_t(\mathbf{w}_t^\top \mathbf{x}))] \\ &= \mathbb{E}_S[D_{U_t^*}(y \| u_{t+1}(\mathbf{w}_{t+1}^\top \mathbf{x}))] + \mathbb{E}_S[D_{U_t^*}(u_{t+1}(\mathbf{w}_{t+1}^\top \mathbf{x}) \| u_t(\mathbf{w}_t^\top \mathbf{x}))] \\ &\quad + \mathbb{E}_S[((U_t^*)'(u_t(\mathbf{w}_t^\top \mathbf{x})) - (U_t^*)'(u_{t+1}(\mathbf{w}_{t+1}^\top \mathbf{x}))) \cdot (u_{t+1}(\mathbf{w}_{t+1}^\top \mathbf{x}) - y)] \quad (43) \end{aligned}$$

$$\begin{aligned} &= \ell_{t+1}^t(S, \mathbf{w}_{t+1}) + \mathbb{E}_S[D_{U_t}(\mathbf{w}_t^\top \mathbf{x} \| u_t^{-1} \circ u_{t+1}(\mathbf{w}_{t+1}^\top \mathbf{x}))] \\ &\quad + \underbrace{\mathbb{E}_S[(\mathbf{w}_t^\top \mathbf{x} - u_t^{-1} \circ u_{t+1}(\mathbf{w}_{t+1}^\top \mathbf{x})) \cdot (u_{t+1}(\mathbf{w}_{t+1}^\top \mathbf{x}) - y)]}_{\doteq \Delta_{t+1}}. \quad (44) \end{aligned}$$

(43) follows from the Bregman triangle equality (3). (44) follows from  $(U_t^*)' \doteq u_t^{-1}$  and (5). Reordering, we get:

$$\ell_{t+1}^t(S, \mathbf{w}_{t+1}) = \ell_t^t(S, \mathbf{w}_t) - \mathbb{E}_S[D_{U_t}(\mathbf{w}_t^\top \mathbf{x} \| u_t^{-1} \circ u_{t+1}(\mathbf{w}_{t+1}^\top \mathbf{x}))] - \Delta_{t+1}, \quad (45)$$

and we further split  $\Delta_{t+1}$  in two:  $\Delta_{t+1} \doteq F_{t+1} + L_{t+1}$ , where

$$F_{t+1} \doteq \mathbb{E}_S[(\mathbf{w}_t^\top \mathbf{x} - u_t^{-1} \circ u_{t+1}(\mathbf{w}_{t+1}^\top \mathbf{x})) \cdot (u_t(\mathbf{w}_{t+1}^\top \mathbf{x}) - y)], \quad (46)$$

$$L_{t+1} \doteq \mathbb{E}_S[(\mathbf{w}_t^\top \mathbf{x} - u_t^{-1} \circ u_{t+1}(\mathbf{w}_{t+1}^\top \mathbf{x})) \cdot (u_{t+1}(\mathbf{w}_{t+1}^\top \mathbf{x}) - u_t(\mathbf{w}_{t+1}^\top \mathbf{x}))]. \quad (47)$$

We now have the following Lemma.

**Lemma D** The following holds for any  $t \geq 0$ :

$$\ell_{t+1}^{t+1}(S, \mathbf{w}_{t+1}) \leq \frac{N_{t-1}}{n_t} \cdot \ell_{t+1}^t(S, \mathbf{w}_{t+1}). \quad (48)$$

**Proof** We use Lemma A and we get:

$$\begin{aligned} D_{U_{t+1}^*}(p \| p') &\leq \frac{1}{2n_t} \cdot (p - p')^2 \\ &\leq \frac{N_{t-1}}{n_t} \cdot D_{U_t^*}(p \| p'), \quad (49) \end{aligned}$$

from which we just compute the expectation in  $\ell_{t+1}^t(S, \mathbf{w}_{t+1})$  and get the result as claimed.  $\blacksquare$

Putting altogether (45), (46), (47) and Lemma D yields,  $\forall t \geq 1$ ,

$$\begin{aligned} \ell_{t+1}^{t+1}(S, \mathbf{w}_{t+1}) &\leq \ell_{t+1}^t(S, \mathbf{w}_{t+1}) + \left(\frac{N_{t-1}}{n_t} - 1\right) \cdot \ell_{t+1}^t(S, \mathbf{w}_{t+1}) \\ &= \ell_t^t(S, \mathbf{w}_t) - \mathbb{E}_S[D_{U_t}(\mathbf{w}_t^\top \mathbf{x} \| u_t^{-1} \circ u_{t+1}(\mathbf{w}_{t+1}^\top \mathbf{x}))] - L_{t+1} \\ &\quad - \left(F_{t+1} - \left(\frac{N_{t-1}}{n_t} - 1\right) \cdot \ell_{t+1}^t(S, \mathbf{w}_{t+1})\right), \quad (50) \end{aligned}$$



as claimed. This ends the proof of Theorem C. ■

Last, we provide a simple result about the gradient step in Step 1.

**Lemma E** *Let  $\hat{\boldsymbol{\mu}}_y \doteq \mathbb{E}_S[y \cdot \mathbf{x}]$  and  $\hat{\boldsymbol{\mu}}_t \doteq \mathbb{E}_S[\hat{y}_t \cdot \mathbf{x}]$ . The gradient update for (9) in Step 1 of the BREGMANTRON yields the following update to get  $\mathbf{w}_{t+1}$ , for some learning rate  $\eta > 0$ :*

$$\mathbf{w}_{t+1} \leftarrow \mathbf{w}_t + \eta \cdot (\hat{\boldsymbol{\mu}}_y - \hat{\boldsymbol{\mu}}_t) . \quad (51)$$

**Proof** We trivially have  $\nabla_{\mathbf{w}} \mathbb{E}_S[D_{U_t}(\mathbf{w}^\top \mathbf{x} \| u_t^{-1}(y))] = \mathbb{E}_S[u_t(\mathbf{w}^\top \mathbf{x}) \cdot \mathbf{x} - y \cdot \mathbf{x}] = \mathbb{E}_S[u_t(\mathbf{w}^\top \mathbf{x}) \cdot \mathbf{x}] - \hat{\boldsymbol{\mu}}_y$ , from which we get, for some  $\eta > 0$  the gradient update:

$$\mathbf{w}_{t+1} \leftarrow \mathbf{w}_t - \eta \cdot \nabla_{\mathbf{w}} \mathbb{E}_S[D_{U_t}(\mathbf{w}^\top \mathbf{x} \| u_t^{-1}(y))]_{|\mathbf{w}=\mathbf{w}_t} = \mathbf{w}_t + \eta \cdot (\hat{\boldsymbol{\mu}}_y - \hat{\boldsymbol{\mu}}_t) , \quad (52)$$

as claimed. ■

## IV.2 Proof of Theorem 5

**Lemma F**  $L_{t+1} \geq 0, \forall t$ .

**Proof** We show that the Lemma is a consequence of the fitting of  $u_{t+1}$  by FIT from Step 3 in BREGMANTRON. The proof elaborates on the proofs sketch of Lemma 2 of Kakade et al. (2011). Denote for short  $N_i \doteq N_t \mathbf{w}_{t+1}^\top \mathbf{x}_i$  and  $n_i \doteq n_t \mathbf{w}_{t+1}^\top \mathbf{x}_i$ . We introduce two  $(m-1)$ -dim vectors of Lagrange multipliers  $\boldsymbol{\lambda}_l$  and  $\boldsymbol{\lambda}_r$  for the top left and right interval constraints and two multipliers  $\rho_1$  and  $\rho_m$  for the additional bounds on  $\hat{y}_1$  and  $\hat{y}_m$  respectively. This gives the Lagrangian,

$$\begin{aligned} \mathcal{L}(\hat{\mathbf{y}}, S | \boldsymbol{\lambda}_l, \boldsymbol{\lambda}_r, \rho_1, \rho_m) &\doteq \mathbb{E}_S[D_{U_t^*}(\hat{\mathbf{y}} \| y_t)] + \sum_{i=1}^{m-1} \lambda_{li} \cdot (\hat{y}_i - \hat{y}_{i+1} + n_{i+1} - n_i) \\ &\quad + \sum_{i=1}^{m-1} \lambda_{ri} \cdot (\hat{y}_{i+1} - \hat{y}_i - N_{i+1} + N_i) + \rho_1 \cdot -\hat{y}_1 + \rho_m \cdot (\hat{y}_m - 1) , \end{aligned}$$

where we let  $q_i \doteq u_t(\mathbf{w}_{t+1}^\top \mathbf{x}_i)$  for readability and we adopt the convention of Boyd & Vandenberghe (2004, Chapter 5) for constraints. Letting  $\boldsymbol{\omega} \in \Delta_m$  (the  $m$ -dim probability simplex) denote the

weight vector of the examples ins  $S$ , we get the following KKT conditions for the optimum:

$$\omega_i(u_t^{-1}(\hat{y}_i) - u_t^{-1}(\hat{y}_{ti})) + \lambda_{l_i} - \lambda_{l_{(i-1)}} + \lambda_{r_{(i-1)}} - \lambda_{r_i} = 0, \forall i = 2, 3, \dots, m-1, \quad (53)$$

$$\omega_i(u_t^{-1}(\hat{y}_1) - u_t^{-1}(\hat{y}_{t1})) + \lambda_{l_1} - \lambda_{r_1} - \rho_1 = 0, \quad (54)$$

$$\omega_i(u_t^{-1}(\hat{y}_m) - u_t^{-1}(\hat{y}_{tm})) - \lambda_{l_{(m-1)}} + \lambda_{r_{(m-1)}} + \rho_m = 0, \quad (55)$$

$$\hat{y}_{i+1} - \hat{y}_i \in [n_{i+1} - n_i, N_{i+1} - N_i], \forall i \in [m-1] \quad (56)$$

$$\hat{y}_1 \geq 0, \quad (57)$$

$$\hat{y}_m \leq 1, \quad (58)$$

$$\lambda_{l_i} \cdot (\hat{y}_i - \hat{y}_{i+1} + n_{i+1} - n_i) = 0, \forall i \in [m-1], \quad (59)$$

$$\lambda_{r_i} \cdot (\hat{y}_{i+1} - \hat{y}_i - N_{i+1} + N_i) = 0, \forall i \in [m-1], \quad (60)$$

$$\rho_1 \cdot -\hat{y}_1 = 0, \quad (61)$$

$$\rho_m \cdot (1 - \hat{y}_m) = 0, \quad (62)$$

$$\boldsymbol{\lambda}_l, \boldsymbol{\lambda}_r \succeq \mathbf{0},$$

$$\rho_1, \rho_m \geq 0.$$

For  $i = 1, 2, \dots, m$ , we define

$$\sigma_i \doteq \sum_{j=i}^m \omega_j(u_t^{-1}(\hat{y}_{tj}) - u_t^{-1}(\hat{y}_j)).$$

We note that by summing the corresponding subset of (117 — 119), we get

$$\sigma_i = \lambda_{r_{(i-1)}} - \lambda_{l_{(i-1)}} + \rho_m, \forall i \in \{2, 3, \dots, m\}, \quad (63)$$

$$\sigma_1 = -\rho_1 + \rho_m. \quad (64)$$

Letting  $\hat{y}_0$  and  $q_0$  denote any identical reals, we obtain:

$$\sum_{i=1}^m \omega_i(u_t^{-1}(\hat{y}_{ti}) - u_t^{-1}(\hat{y}_i)) \cdot (\hat{y}_i - q_i) = \sum_{i=1}^m \sigma_i \cdot ((\hat{y}_i - q_i) - (\hat{y}_{(i-1)} - q_{(i-1)})), \quad (65)$$

which we are going to show is non-negative, which is the statement of the Lemma, in two steps:

**Step 1** – We show, for any  $i \geq 1$ ,

$$(\sigma_i - \rho_m) \cdot ((\hat{y}_i - q_i) - (\hat{y}_{(i-1)} - q_{(i-1)})) \geq 0. \quad (66)$$

We have four cases:

**Case 1.1**  $i > 1$ ,  $\sigma_i - \rho_m > 0$ . In this case,  $\lambda_{r_{(i-1)}} > \lambda_{l_{(i-1)}}$ , implying  $\lambda_{r_{(i-1)}} > 0$  and so from eq. (123),  $\hat{y}_i - \hat{y}_{(i-1)} - N_i + N_{(i-1)} = 0$ , and so  $\hat{y}_i - \hat{y}_{(i-1)} = N_t \mathbf{w}_{t+1}^\top (\mathbf{x}_i - \mathbf{x}_{(i-1)})$ . Lemma A applied to  $u_t$  gives

$$u_t(\mathbf{w}_{t+1}^\top \mathbf{x}_i) - u_t(\mathbf{w}_{t+1}^\top \mathbf{x}_{(i-1)}) \leq N_t \mathbf{w}_{t+1}^\top (\mathbf{x}_i - \mathbf{x}_{(i-1)}), \quad (67)$$

and so  $\hat{y}_i - \hat{y}_{(i-1)} \geq q_i - q_{(i-1)}$ , that is,  $(\hat{y}_i - q_i) - (\hat{y}_{(i-1)} - q_{(i-1)}) \geq 0$ .

**Case 1.2**  $i > 1$ ,  $\sigma_i - \rho_m < 0$ . In this case,  $\lambda_{l_{(i-1)}} > \lambda_{r_{(i-1)}}$ , implying  $\lambda_{l_{(i-1)}} > 0$ , and so from eq.

(122),  $\hat{y}_{(i-1)} - \hat{y}_i + n_i - n_{(i-1)} = 0$  and so  $\hat{y}_i - \hat{y}_{(i-1)} = n_t \mathbf{w}_{t+1}^\top (\mathbf{x}_i - \mathbf{x}_{(i-1)})$ . Lemma A applied to  $u_t$  also gives

$$u_t(\mathbf{w}_{t+1}^\top \mathbf{x}_i) - u_t(\mathbf{w}_{t+1}^\top \mathbf{x}_{(i-1)}) \geq n_t \mathbf{w}_{t+1}^\top (\mathbf{x}_i - \mathbf{x}_{(i-1)}) , \quad (68)$$

and so  $q_i - q_{(i-1)} \geq \hat{y}_i - \hat{y}_{(i-1)}$ , or, equivalently,  $(\hat{y}_i - q_i) - (\hat{y}_{(i-1)} - q_{(i-1)}) \leq 0$ .

**Case 1.3**  $i = 1, \rho_1 > 0$ . The case  $i = 1$  yields  $\sigma_1 - \rho_m = -\rho_1$ . It comes from KKT condition (124) that  $\hat{y}_1 = 0$ , and since  $q_1 \geq 0$  (because of FIT), we get  $\sigma_1 - \rho_m < 0, \hat{y}_1 - q_1 \leq 0$  and since  $\hat{y}_0 = q_0$ , we get the statement of (66).

**Case 1.4**  $i = 1, \rho_1 = 0$ . We obtain  $\sigma_1 - \rho_m = 0$  and so (66) immediately holds.

**Step 2** – We sum (66) for  $i \in [m]$ , getting

$$\begin{aligned} \sum_{i=1}^m \sigma_i \cdot ((\hat{y}_i - q_i) - (\hat{y}_{(i-1)} - q_{(i-1)})) &\geq \sum_{i=1}^m \rho_m \cdot ((\hat{y}_i - q_i) - (\hat{y}_{(i-1)} - q_{(i-1)})) \\ &= \rho_m \cdot (\hat{y}_m - q_m). \end{aligned} \quad (69)$$

We show that the right-hand side of (69) is non-negative. Indeed, it is immediate if  $\rho_m = 0$ , and if  $\rho_m > 0$ , then it comes from KKT condition (125) that  $\hat{y}_1 = 1$ , and since  $q_m \leq 1$  (because of FIT), we get  $\rho_m \cdot (\hat{y}_m - q_m) = \rho_m \cdot (1 - q_m) \geq 0$ .

To summarize our two steps, we have shown that

$$\sum_{i=1}^m \sigma_i \cdot ((\hat{y}_i - q_i) - (\hat{y}_{(i-1)} - q_{(i-1)})) \geq \rho_m \cdot (\hat{y}_m - q_m) \geq 0 ,$$

which brings from (65) that

$$\mathbb{E}_S[(u_t^{-1}(\hat{y}_t) - u_t^{-1}(\hat{y}_{t+1})) \cdot (\hat{y}_{t+1} - u_t(\mathbf{w}_{t+1}^\top \mathbf{x}))] \geq 0 , \quad (70)$$

which after using the fact that FIT guarantees  $\hat{y}_{t+1} = u_{t+1}(\mathbf{w}_{t+1}^\top \mathbf{x}), \forall t$ , yields

$$\mathbb{E}_S[(\mathbf{w}_t^\top \mathbf{x} - u_t^{-1} \circ u_{t+1}(\mathbf{w}_{t+1}^\top \mathbf{x})) \cdot (u_{t+1}(\mathbf{w}_{t+1}^\top \mathbf{x}) - u_t(\mathbf{w}_{t+1}^\top \mathbf{x}))] \geq 0 , \quad (71)$$

which is the statement of Lemma F. ■

We recall

$$\hat{\boldsymbol{\mu}}_y \doteq \mathbb{E}_S[y \cdot \mathbf{x}], \quad (72)$$

$$\hat{\boldsymbol{\mu}}_t \doteq \mathbb{E}_S[\hat{y}_t \cdot \mathbf{x}], \forall t \geq 1, \quad (73)$$

Finally, we let

$$p_t^* \doteq \max\{\mathbb{E}_S[y], \mathbb{E}_S[u_t(\mathbf{w}_{t+1}^\top \mathbf{x})]\} \in [0, 1]. \quad (74)$$

**Lemma G** Fix any lowerbound  $\delta_t > 0$  such that

$$\frac{\|\hat{\boldsymbol{\mu}}_y - \hat{\boldsymbol{\mu}}_t\|_2}{X} \geq 2\sqrt{p_t^* \delta_t}. \quad (75)$$

Fix any  $\gamma_t$  satisfying:

$$\gamma_t \in \left[0, \sqrt{\frac{\delta_t}{2(2 + \delta_t)}}\right], \quad (76)$$

and learning rate

$$\eta = \frac{1 - \gamma_t}{2N_t X^2} \cdot \left(1 - \frac{\delta_t(2 + \delta_t)}{(1 + \delta_t)^2} \cdot \frac{p_t^* X}{\|\hat{\boldsymbol{\mu}}_y - \hat{\boldsymbol{\mu}}_t\|_2}\right). \quad (77)$$

Suppose  $\alpha_t, \beta_t \leq \delta_t/(1 + \delta_t)$  and

$$\frac{N_t}{n_t}, \frac{N_{t-1}}{n_t} \leq 1 + \frac{\delta_t}{1 + \delta_t}. \quad (78)$$

Then

$$F_{t+1} \geq \left(\frac{N_{t-1}}{n_t} - 1\right) \cdot \frac{p_t^*}{2n_t} + \frac{p_t^* \delta_t}{n_t(1 + \delta_t)}. \quad (79)$$

**Remark:** it can be shown from (75) (see also 109) that  $\eta$  belongs to the following interval:

$$\eta \in \frac{1 - \gamma_t}{2N_t X^2} \cdot \left(1 - \frac{\sqrt{\delta_t p_t^*}(2 + \delta_t)}{2(1 + \delta_t)^2} \cdot \left[\sqrt{\delta_t p_t^*}, 1\right]\right).$$

Also, since  $\|\hat{\boldsymbol{\mu}}_y - \hat{\boldsymbol{\mu}}_t\|_2 \leq 2X$ , (75) implies

$$\delta_t \leq \frac{1}{p_t^*}. \quad (80)$$

**Proof** The following two facts are consequences of Lemmata E, A and the continuity of  $u_t$ :  $\forall i \in [m]$ ,

$$\begin{aligned} \exists p_i \in [N^{-1}, n^{-1}] : u_t^{-1} \circ u_{t+1}(\mathbf{w}_{t+1}^\top \mathbf{x}_i) &= u_t^{-1} \circ u_t(\mathbf{w}_{t+1}^\top \mathbf{x}_i) \\ &\quad + p_i \cdot (u_{t+1}(\mathbf{w}_{t+1}^\top \mathbf{x}_i) - u_t(\mathbf{w}_{t+1}^\top \mathbf{x}_i)) \\ &= \mathbf{w}_{t+1}^\top \mathbf{x}_i + p_i \cdot (u_{t+1}(\mathbf{w}_{t+1}^\top \mathbf{x}_i) - u_t(\mathbf{w}_{t+1}^\top \mathbf{x}_i)) \end{aligned} \quad (81)$$

$$\begin{aligned} \exists r_i \in [n, N] : u_t(\mathbf{w}_{t+1}^\top \mathbf{x}_i) &= u_t(\mathbf{w}_t^\top \mathbf{x}_i) + r_i \cdot (\mathbf{w}_{t+1} - \mathbf{w}_t)^\top \mathbf{x}_i \\ &= u_t(\mathbf{w}_t^\top \mathbf{x}_i) + \eta r_i \cdot (\hat{\boldsymbol{\mu}}_y - \hat{\boldsymbol{\mu}}_t)^\top \mathbf{x}_i. \end{aligned} \quad (82)$$

Folding (81) and (82) in  $F_{t+1}$ , we get:

$$\begin{aligned}
F_{t+1} &= \mathbb{E}_S \left[ (u_t^{-1} \circ u_{t+1}(\mathbf{w}_{t+1}^\top \mathbf{x}) - \mathbf{w}_t^\top \mathbf{x}) \cdot (y - u_t(\mathbf{w}_{t+1}^\top \mathbf{x})) \right] \\
&= \mathbb{E}_S \left[ \left\{ \begin{aligned} &(\mathbf{w}_{t+1}^\top \mathbf{x} - \mathbf{w}_t^\top \mathbf{x} + p \cdot (u_{t+1}(\mathbf{w}_{t+1}^\top \mathbf{x}) - u_t(\mathbf{w}_{t+1}^\top \mathbf{x}))) \\ &\cdot (y - u_t(\mathbf{w}_t^\top \mathbf{x}) - \eta r \cdot (\hat{\boldsymbol{\mu}}_y - \hat{\boldsymbol{\mu}}_t)^\top \mathbf{x}) \end{aligned} \right\} \right] \\
&= \mathbb{E}_S \left[ \left\{ \begin{aligned} &(\eta \cdot (\hat{\boldsymbol{\mu}}_y - \hat{\boldsymbol{\mu}}_t)^\top \mathbf{x} + p \cdot (u_{t+1}(\mathbf{w}_{t+1}^\top \mathbf{x}) - u_t(\mathbf{w}_{t+1}^\top \mathbf{x}))) \\ &\cdot (y - u_t(\mathbf{w}_t^\top \mathbf{x}) - \eta r \cdot (\hat{\boldsymbol{\mu}}_y - \hat{\boldsymbol{\mu}}_t)^\top \mathbf{x}) \end{aligned} \right\} \right] \tag{83} \\
&= \eta \cdot (\hat{\boldsymbol{\mu}}_y - \hat{\boldsymbol{\mu}}_t)^\top \mathbb{E}_S [y \cdot \mathbf{x} - u_t(\mathbf{w}_t^\top \mathbf{x}) \cdot \mathbf{x}] \\
&\quad + \mathbb{E}_S [p \cdot (u_{t+1}(\mathbf{w}_{t+1}^\top \mathbf{x}) - u_t(\mathbf{w}_{t+1}^\top \mathbf{x})) \cdot (y - u_t(\mathbf{w}_t^\top \mathbf{x}))] \\
&\quad - \eta^2 \cdot \mathbb{E}_S [r \cdot ((\hat{\boldsymbol{\mu}}_y - \hat{\boldsymbol{\mu}}_t)^\top \mathbf{x})^2] \\
&\quad - \eta \cdot (\hat{\boldsymbol{\mu}}_y - \hat{\boldsymbol{\mu}}_t)^\top \mathbb{E}_S [pr(u_{t+1}(\mathbf{w}_{t+1}^\top \mathbf{x}) - u_t(\mathbf{w}_{t+1}^\top \mathbf{x})) \cdot \mathbf{x}] \\
&= \eta \cdot \|\hat{\boldsymbol{\mu}}_y - \hat{\boldsymbol{\mu}}_t\|_2^2 + \underbrace{\mathbb{E}_S [p \cdot (u_{t+1}(\mathbf{w}_{t+1}^\top \mathbf{x}) - u_t(\mathbf{w}_{t+1}^\top \mathbf{x})) \cdot (y - u_t(\mathbf{w}_t^\top \mathbf{x}))]}_{\doteq A} \\
&\quad - \underbrace{\eta^2 \cdot \mathbb{E}_S [r \cdot ((\hat{\boldsymbol{\mu}}_y - \hat{\boldsymbol{\mu}}_t)^\top \mathbf{x})^2]}_{\doteq B} \\
&\quad - \underbrace{\eta \cdot (\hat{\boldsymbol{\mu}}_y - \hat{\boldsymbol{\mu}}_t)^\top \mathbb{E}_S [pr(u_{t+1}(\mathbf{w}_{t+1}^\top \mathbf{x}) - u_t(\mathbf{w}_{t+1}^\top \mathbf{x})) \cdot \mathbf{x}]}_{\doteq C}. \tag{84}
\end{aligned}$$

We now bound lowerbound  $A$  and upperbound  $B, C$ . Lemma B brings

$$\min \left\{ -\beta_t, \frac{n_t}{N_t} - 1 \right\} \cdot u_t(\mathbf{w}_{t+1}^\top \mathbf{x}) \leq u_{t+1}(\mathbf{w}_{t+1}^\top \mathbf{x}) - u_t(\mathbf{w}_{t+1}^\top \mathbf{x}), \tag{85}$$

and

$$u_{t+1}(\mathbf{w}_{t+1}^\top \mathbf{x}) - u_t(\mathbf{w}_{t+1}^\top \mathbf{x}) \leq \max \left\{ \alpha_t, \frac{N_t}{n_t} - 1 \right\} \cdot u_t(\mathbf{w}_{t+1}^\top \mathbf{x}), \tag{86}$$

and so we get

$$\begin{aligned}
A &\doteq \mathbb{E}_S [p \cdot (u_{t+1}(\mathbf{w}_{t+1}^\top \mathbf{x}) - u_t(\mathbf{w}_{t+1}^\top \mathbf{x})) \cdot (y - u_t(\mathbf{w}_t^\top \mathbf{x}))] \\
&= \mathbb{E}_S [py \cdot (u_{t+1}(\mathbf{w}_{t+1}^\top \mathbf{x}) - u_t(\mathbf{w}_{t+1}^\top \mathbf{x}))] - \mathbb{E}_S [pu_t(\mathbf{w}_t^\top \mathbf{x}) \cdot (u_{t+1}(\mathbf{w}_{t+1}^\top \mathbf{x}) - u_t(\mathbf{w}_{t+1}^\top \mathbf{x}))] \\
&\geq -\frac{1}{n_t} \cdot \max \left\{ \beta_t, 1 - \frac{n_t}{N_t} \right\} \mathbb{E}_S [u_t(\mathbf{w}_{t+1}^\top \mathbf{x})] - \frac{1}{n_t} \cdot \max \left\{ \alpha_t, \frac{N_t}{n_t} - 1 \right\} \mathbb{E}_S [u_t(\mathbf{w}_{t+1}^\top \mathbf{x})u_t(\mathbf{w}_t^\top \mathbf{x})] \\
&\geq -\frac{1}{n_t} \cdot \max \left\{ \alpha_t, \beta_t, 1 - \frac{n_t}{N_t}, \frac{N_t}{n_t} - 1 \right\} \mathbb{E}_S [u_t(\mathbf{w}_{t+1}^\top \mathbf{x})] \\
&\geq -\frac{1}{n_t} \cdot \max \left\{ \alpha_t, \beta_t, \frac{N_t}{n_t} - 1 \right\} p_t^*, \tag{87}
\end{aligned}$$

since  $y \in \{0, 1\}$ ,  $U_t \leq 1$  and  $1 - (1/z) \leq z - 1$  for  $z \geq 0$ . Cauchy-Schwartz inequality and (82) yield

$$\begin{aligned}
B &\leq \eta^2 \cdot \mathbb{E}_S [r \cdot \|\hat{\boldsymbol{\mu}}_y - \hat{\boldsymbol{\mu}}_t\|_2^2 \|\mathbf{x}\|_2^2] \\
&\leq \eta^2 N X^2 \cdot \|\hat{\boldsymbol{\mu}}_y - \hat{\boldsymbol{\mu}}_t\|_2^2. \tag{88}
\end{aligned}$$

We also have successively because of Cauchy-Schwartz inequality, the triangle inequality, Lemma A and (86)

$$\begin{aligned}
C &\leq \eta \cdot \|\hat{\boldsymbol{\mu}}_y - \hat{\boldsymbol{\mu}}_t\|_2 \cdot \|\mathbb{E}_S [pr(u_{t+1}(\mathbf{w}_{t+1}^\top \mathbf{x}) - u_t(\mathbf{w}_{t+1}^\top \mathbf{x})) \cdot \mathbf{x}]\|_2 \\
&\leq \eta \cdot \|\hat{\boldsymbol{\mu}}_y - \hat{\boldsymbol{\mu}}_t\|_2 \cdot \mathbb{E}_S [pr|u_{t+1}(\mathbf{w}_{t+1}^\top \mathbf{x}) - u_t(\mathbf{w}_{t+1}^\top \mathbf{x})| \cdot \|\mathbf{x}\|_2] \\
&\leq \frac{\eta N_t}{n_t} \cdot \|\hat{\boldsymbol{\mu}}_y - \hat{\boldsymbol{\mu}}_t\|_2 \cdot \mathbb{E}_S [|u_{t+1}(\mathbf{w}_{t+1}^\top \mathbf{x}) - u_t(\mathbf{w}_{t+1}^\top \mathbf{x})| \cdot \|\mathbf{x}\|_2] \\
&\leq \frac{\eta N_t \max \left\{ \alpha_t, \frac{N_t}{n_t} - 1 \right\} X}{n_t} \cdot \|\hat{\boldsymbol{\mu}}_y - \hat{\boldsymbol{\mu}}_t\|_2 \cdot \mathbb{E}_S [u_t(\mathbf{w}_{t+1}^\top \mathbf{x})] \\
&\leq \frac{\eta N_t \max \left\{ \alpha_t, \frac{N_t}{n_t} - 1 \right\} X p_t^*}{n_t} \cdot \|\hat{\boldsymbol{\mu}}_y - \hat{\boldsymbol{\mu}}_t\|_2 .
\end{aligned} \tag{89}$$

We thus get

$$\begin{aligned}
&F_{t+1} - \left( \frac{N_{t-1}}{n_t} - 1 \right) \cdot \frac{p_t^*}{n_t} \\
&\geq \eta \cdot \|\hat{\boldsymbol{\mu}}_y - \hat{\boldsymbol{\mu}}_t\|_2^2 - \frac{1}{n_t} \cdot \max \left\{ \alpha_t, \beta_t, \frac{N_t}{n_t} - 1 \right\} p_t^* - \left( \frac{N_{t-1}}{n_t} - 1 \right) \cdot \frac{p_t^*}{n_t} \\
&\quad - \eta^2 N_t X^2 \cdot \|\hat{\boldsymbol{\mu}}_y - \hat{\boldsymbol{\mu}}_t\|_2^2 - \frac{\eta N_t \max \left\{ \alpha_t, \frac{N_t}{n_t} - 1 \right\} X p_t^*}{n_t} \cdot \|\hat{\boldsymbol{\mu}}_y - \hat{\boldsymbol{\mu}}_t\|_2 \\
&\geq \eta \cdot \|\hat{\boldsymbol{\mu}}_y - \hat{\boldsymbol{\mu}}_t\|_2^2 - \frac{2 \max \left\{ \alpha_t, \beta_t, \frac{N_t}{n_t} - 1, \frac{N_{t-1}}{n_t} - 1 \right\} p_t^*}{n_t} - \eta^2 N_t X^2 \cdot \|\hat{\boldsymbol{\mu}}_y - \hat{\boldsymbol{\mu}}_t\|_2^2 \\
&\quad - \frac{\eta N_t \max \left\{ \alpha_t, \frac{N_t}{n_t} - 1 \right\} X p_t^*}{n_t} \cdot \|\hat{\boldsymbol{\mu}}_y - \hat{\boldsymbol{\mu}}_t\|_2 \\
&= \eta \cdot \|\hat{\boldsymbol{\mu}}_y - \hat{\boldsymbol{\mu}}_t\|_2^2 - \frac{2 \max \left\{ \alpha_t, \beta_t, \frac{N_t}{n_t} - 1, \frac{N_{t-1}}{n_t} - 1 \right\} p_t^*}{n_t} - \eta^2 N_t X^2 \cdot \|\hat{\boldsymbol{\mu}}_y - \hat{\boldsymbol{\mu}}_t\|_2^2 \\
&\quad - \frac{\eta N_t \max \{ n_t \alpha_t, N_t - n_t \} X p_t^*}{n_t^2} \cdot \|\hat{\boldsymbol{\mu}}_y - \hat{\boldsymbol{\mu}}_t\|_2 \\
&= \tilde{\eta} \cdot \|\hat{\boldsymbol{\mu}}_y - \hat{\boldsymbol{\mu}}_t\|_2 - \frac{2 \max \left\{ \alpha_t, \beta_t, \frac{N_t}{n_t} - 1, \frac{N_{t-1}}{n_t} - 1 \right\} p_t^*}{n_t} - \tilde{\eta}^2 N_t X^2 \\
&\quad - \frac{\tilde{\eta} N_t \max \{ n_t \alpha_t, N_t - n_t \} X p_t^*}{n^2} \\
&\geq \underbrace{-a\tilde{\eta}^2 + b\tilde{\eta} + c}_{\doteq J(\tilde{\eta})},
\end{aligned} \tag{90}$$

with  $\tilde{\eta} \doteq \eta \cdot \|\hat{\boldsymbol{\mu}}_y - \hat{\boldsymbol{\mu}}_t\|_2$  and:

$$a \doteq N_t X^2, \tag{91}$$

$$b \doteq \|\hat{\boldsymbol{\mu}}_y - \hat{\boldsymbol{\mu}}_t\|_2 - \varepsilon_t(1 + \varepsilon_t) \cdot p_t^* X, \tag{92}$$

$$c \doteq -\frac{2\varepsilon_t p_t^*}{n_t}, \tag{93}$$

where  $\varepsilon_t$  is any real satisfying

$$\varepsilon_t \geq \max \left\{ \alpha_t, \beta_t, \frac{N_t}{n_t} - 1, \frac{N_{t-1}}{n_t} - 1 \right\}. \quad (94)$$

Remark that

$$2\sqrt{a(1 + \varepsilon_t) \cdot -c} = 2\sqrt{2\varepsilon_t(1 + \varepsilon_t)}\sqrt{p_t^*X},$$

so if we can guarantee that  $b^2 \geq 4a(1 + \varepsilon_t) \cdot -c$ , then fixing  $\tilde{\eta} \doteq (1 - \gamma_t)b/(2a)$  for some  $\gamma_t \in [0, 1]$  yields from (90)

$$\begin{aligned} J(\tilde{\eta}) &= \frac{b^2(1 - \gamma_t^2)}{4a} + c \\ &\geq -\varepsilon_t c + \gamma_t^2(1 + \varepsilon_t)c \end{aligned} \quad (95)$$

The condition on  $b$  is implied by the following one, since  $p_t^* \leq 1$ :

$$\|\hat{\boldsymbol{\mu}}_y - \hat{\boldsymbol{\mu}}_t\|_2 \geq 2\sqrt{2\varepsilon_t(1 + \varepsilon_t)}\sqrt{p_t^*X} + \varepsilon_t(1 + \varepsilon_t)\sqrt{p_t^*X}. \quad (96)$$

Fix any  $K_t > 1$ . It is easy to check that for any

$$\varepsilon_t \leq \sqrt{K_t} - 1, \quad (97)$$

we have  $\varepsilon_t \leq 2(\sqrt{K_t} - \sqrt{2})\sqrt{\varepsilon_t}$ , so a sufficient condition to get (96) is

$$\sqrt{\varepsilon_t(1 + \varepsilon_t)} \leq \frac{\|\hat{\boldsymbol{\mu}}_y - \hat{\boldsymbol{\mu}}_t\|_2}{2\sqrt{K_t}\sqrt{p_t^*X}}. \quad (98)$$

Letting  $f(z) \doteq \sqrt{z}(1 + z)$ , it is not hard to check that if we pick  $z = \min\{\sqrt{K_t} - 1, u^2/K_t\}$  then  $f(z) \leq u$ : indeed,

- if the min is  $u^2/K_t$ , implying  $u \leq \sqrt{K_t(\sqrt{K_t} - 1)}$ , then  $f(z)$  being increasing we observe  $f(z) \leq f(u^2/K_t) \leq u$ , which simplifies for the rightmost inequality into  $u \leq \sqrt{K_t(\sqrt{K_t} - 1)}$ , which is our assumption;
- if the min is  $\sqrt{K_t} - 1$ , implying  $u \geq \sqrt{K_t(\sqrt{K_t} - 1)}$ , then this time we directly get  $f(z) = \sqrt{\sqrt{K_t} - 1}(1 + \sqrt{K_t} - 1) = \sqrt{K_t(\sqrt{K_t} - 1)} \leq u$ , as claimed.

To summarize, if we pick

$$\varepsilon_t \doteq \min \left\{ \sqrt{K_t} - 1, \frac{\|\hat{\boldsymbol{\mu}}_y - \hat{\boldsymbol{\mu}}_t\|_2^2}{4K_t^2 p_t^* X^2} \right\}, \quad (99)$$

then we check that our precondition (97) holds and we obtain from (90) and (95),

$$F_{t+1} - \left( \frac{N_{t-1}}{n_t} - 1 \right) \cdot \frac{p_t^*}{n} \geq \frac{2\varepsilon_t^2 p_t^*}{n_t} - \frac{2\gamma_t^2 \varepsilon_t (1 + \varepsilon_t) p_t^*}{n_t}. \quad (100)$$

Suppose  $\gamma_t$  satisfies

$$(1 + \varepsilon_t)\gamma_t^2 \leq \frac{\varepsilon_t}{2}. \quad (101)$$

In this case, we further lowerbound (100) as

$$\begin{aligned} F_{t+1} - \left(\frac{N_{t-1}}{n_t} - 1\right) \cdot \frac{p_t^*}{n} &\geq \frac{\varepsilon_t^2 p_t^*}{n_t} \\ &= \frac{p_t^*}{n_t} \cdot \left(\min \left\{ \sqrt{K_t} - 1, \frac{\|\hat{\boldsymbol{\mu}}_y - \hat{\boldsymbol{\mu}}_t\|_2^2}{4K_t^2 p_t^* X^2} \right\}\right)^2. \end{aligned} \quad (102)$$

To simplify this bound and make it more readable, suppose we fix a lowerbound

$$\frac{\|\hat{\boldsymbol{\mu}}_y - \hat{\boldsymbol{\mu}}_t\|_2^2}{4p_t^* X^2} \geq \delta_t, \quad (103)$$

for some  $\delta_t > 0$ . Some simple calculation shows that if we pick

$$K_t \doteq \left(1 + \frac{\delta_t}{1 + \delta_t}\right)^2, \quad (104)$$

then the min in (102) is achieved in  $\sqrt{K_t} - 1$ , which therefore guarantees

$$F_{t+1} - \left(\frac{N_{t-1}}{n_t} - 1\right) \cdot \frac{p_t^*}{n_t} \geq \frac{p_t^* \delta_t}{n_t(1 + \delta_t)}, \quad (105)$$

and therefore gives the choice  $\varepsilon_t = \delta_t/(1 + \delta_t)$ . The constraint on  $\gamma_t$  from (101) becomes

$$\gamma_t \leq \sqrt{\frac{\delta_t}{2(2 + \delta_t)}}, \quad (106)$$

and it comes from (94) that  $\alpha_t, \beta_t \leq \delta_t/(1 + \delta_t)$  and

$$\frac{N_t}{n_t}, \frac{N_{t-1}}{n_t} \leq 1 + \frac{\delta_t}{1 + \delta_t}, \quad (107)$$

as claimed. This ends the proof of Lemma G, after having remarked that the learning rate  $\eta$  is then fixed to be (from (90))

$$\begin{aligned} \eta &\doteq \frac{\tilde{\eta}}{\|\hat{\boldsymbol{\mu}}_y - \hat{\boldsymbol{\mu}}_t\|_2} \\ &= \frac{1 - \gamma_t}{2\|\hat{\boldsymbol{\mu}}_y - \hat{\boldsymbol{\mu}}_t\|_2 N_t X^2} \cdot \left( \|\hat{\boldsymbol{\mu}}_y - \hat{\boldsymbol{\mu}}_t\|_2 - \frac{\delta_t(2 + \delta_t)}{(1 + \delta_t)^2} p_t^* X \right) \\ &= \frac{1 - \gamma_t}{2N_t X^2} \cdot \left( 1 - \frac{\delta_t(2 + \delta_t)}{(1 + \delta_t)^2} \cdot \frac{p_t^* X}{\|\hat{\boldsymbol{\mu}}_y - \hat{\boldsymbol{\mu}}_t\|_2} \right), \end{aligned} \quad (108)$$

and it satisfies, because of (103),

$$\eta \geq \frac{1 - \gamma_t}{2N_t X^2} \cdot \left( 1 - \frac{\sqrt{\delta_t p_t^*}(2 + \delta_t)}{2(1 + \delta_t)^2} \right) \quad (109)$$



and since  $\|\hat{\boldsymbol{\mu}}_y - \hat{\boldsymbol{\mu}}_t\|_2 \leq 2X$ ,

$$\eta \leq \frac{1 - \gamma_t}{2N_t X^2} \cdot \left(1 - \frac{\delta_t p_t^* (2 + \delta_t)}{2(1 + \delta_t)^2}\right) \quad (110)$$

(we note that (103) implies  $\delta_t p_t^* \leq 1$ ) This ends the proof of Lemma G. ■

We now show a lowerbound on  $Q_{t+1}$  in Theorem C.

**Lemma H** *Suppose the setting of Lemma G holds. Then*

$$Q_{t+1} \geq \frac{p_t^* \delta_t}{n_t (1 + \delta_t)}. \quad (111)$$

**Proof** Remind that it comes from Theorem C

$$Q_{t+1} \doteq F_{t+1} - \left(\frac{N_{t-1}}{n_t} - 1\right) \cdot \ell_{t+1}^t(S, \mathbf{w}_{t+1}).$$

We have using Lemma A,

$$\begin{aligned} \ell_{t+1}^t(S, \mathbf{w}_{t+1}) &\doteq \mathbb{E}_S[D_{U_t^*}(y \| u_t(\mathbf{w}_{t+1}^\top \mathbf{x}))] \\ &\leq \frac{1}{2n_t} \cdot \mathbb{E}_S[(y - u_t(\mathbf{w}_{t+1}^\top \mathbf{x}))^2] \\ &= \frac{1}{2n_t} \cdot (\mathbb{E}_S[y] - 2\mathbb{E}_S[y u_t(\mathbf{w}_{t+1}^\top \mathbf{x})] + \mathbb{E}_S[u_t(\mathbf{w}_{t+1}^\top \mathbf{x})^2]) \\ &\leq \frac{\mathbb{E}_S[y] + \mathbb{E}_S[u_t(\mathbf{w}_{t+1}^\top \mathbf{x})]}{2n_t} \\ &\leq \frac{p_t^*}{n_t}, \end{aligned} \quad (112)$$

because  $u_t(z) \leq 1$ . We get

$$\left(\frac{N_{t-1}}{n_t} - 1\right) \cdot \ell_{t+1}^t(S, \mathbf{w}_{t+1}) \leq \left(\frac{N_{t-1}}{n_t} - 1\right) \cdot \frac{p_t^*}{n_t}, \quad (113)$$

so using Lemma G, we get

$$\begin{aligned} Q_{t+1} &\geq F_{t+1} - \left(\frac{N_{t-1}}{n_t} - 1\right) \cdot \frac{p_t^*}{n_t} \\ &\geq \frac{p_t^* \delta_t}{n_t (1 + \delta_t)}, \end{aligned} \quad (114)$$

as claimed. ■

Remind from Theorem C that

$$\ell_{t+1}^{t+1}(S, \mathbf{w}_{t+1}) \leq \ell_t^t(S, \mathbf{w}_t) - \mathbb{E}_S[D_{U_t}(u_t^\top \mathbf{x} \| u_t^{-1} \circ u_{t+1}(\mathbf{w}_{t+1}^\top \mathbf{x}))] - L_{t+1} - Q_{t+1},$$

and we know that

- $\mathbb{E}_S[D_{U_t}(\mathbf{w}_t^\top \mathbf{x} \| u_t^{-1} \circ u_{t+1}(\mathbf{w}_{t+1}^\top \mathbf{x}))] \geq 0$ , because a Bregman divergence cannot be negative;
- $L_{t+1} \geq 0$  from Lemma F;
- $Q_{t+1} \geq p_t^* \delta_t / (n_t(1 + \delta_t))$  from Lemma H (assuming the conditions of Lemma G).

Putting this altogether, we get

$$\ell_{t+1}^{t+1}(S, \mathbf{w}_{t+1}) \leq \ell_t^t(S, \mathbf{w}_t) - \frac{p_t^* \delta_t}{n_t(1 + \delta_t)},$$

which then easily translates into the statement of Theorem 5.

## V Proof of Corollary 6

To make things explicit, we replace Step 3 in the BREGMANTRON by the following new Step 3:

Step 3 fit  $\hat{\mathbf{y}}_{t+1}$  by solving for global optimum:

$$\begin{aligned} \hat{\mathbf{y}}_{t+1} &\doteq \arg \min_{\hat{\mathbf{y}}} \mathbb{E}_S[D_{U_t^*}(\hat{\mathbf{y}} \| \hat{\mathbf{y}}_t)] && // \text{proper composite fitting of } \hat{\mathbf{y}}_{t+1} \text{ given } \mathbf{w}_{t+1}, u_t \\ \text{s.t. } &\begin{cases} \hat{y}_{i+1} - \hat{y}_i \in [n_t \cdot (\mathbf{w}_{t+1}^\top (\mathbf{x}_{i+1} - \mathbf{x}_i)), N_t \cdot (\mathbf{w}_{t+1}^\top (\mathbf{x}_{i+1} - \mathbf{x}_i))] , \forall i \in [m-1] \\ \hat{y}_1 \in [(1 - \beta_t)u_t(\mathbf{w}_{t+1}^\top \mathbf{x}_1), (1 + \alpha_t)u_t(\mathbf{w}_{t+1}^\top \mathbf{x}_1)] \\ \hat{y}_m \leq 1 \end{cases} && (115) \end{aligned}$$

The only step that needs update in the proof of Theorem 5 is Lemma F. We now show that the property still holds for this new Step 3.

**Lemma I**  $L_{t+1} \geq 0, \forall t$ .

**Proof** The proof proceeds from the same steps as for Lemma F. We reuse the same notations. This time, we get the Lagrangian,

$$\begin{aligned} \mathcal{L}(\hat{\mathbf{y}}, S | \boldsymbol{\lambda}_l, \boldsymbol{\lambda}_r, \rho_1, \rho_m) &\doteq \mathbb{E}_S[D_{U_t^*}(\hat{\mathbf{y}} \| \hat{\mathbf{y}}_t)] + \sum_{i=1}^{m-1} \lambda_{l_i} \cdot (\hat{y}_i - \hat{y}_{i+1} + n_{i+1} - n_i) \\ &+ \sum_{i=1}^{m-1} \lambda_{r_i} \cdot (\hat{y}_{i+1} - \hat{y}_i - N_{i+1} + N_i) + \rho_1 \cdot ((1 - \beta_t)q_1 - \hat{y}_1) \\ &+ \rho'_1 \cdot (\hat{y}_1 - (1 + \alpha_t)q_1) + \rho_m \cdot (\hat{y}_m - 1) , && (116) \end{aligned}$$

and the following KKT conditions for the optimum:

$$\omega_i(u_t^{-1}(\hat{y}_i) - u_t^{-1}(\hat{y}_{ti})) + \lambda_{li} - \lambda_{li-1} + \lambda_{ri-1} - \lambda_{ri} = 0, \forall i = 2, 3, \dots, m-1, \quad (117)$$

$$\omega_i(u_t^{-1}(\hat{y}_1) - u_t^{-1}(\hat{y}_{t1})) + \lambda_{l1} - \lambda_{r1} - \rho_1 + \rho'_1 = 0, \quad (118)$$

$$\omega_i(u_t^{-1}(\hat{y}_m) - u_t^{-1}(\hat{y}_{tm})) - \lambda_{lm-1} + \lambda_{rm-1} - \rho_m = 0, \quad (119)$$

$$\hat{y}_{i+1} - \hat{y}_i \in [n_{i+1} - n_i, N_{i+1} - N_i], \forall i \in [m-1] \quad (120)$$

$$\hat{y}_1 \in q_1 \cdot [1 - \beta_t, 1 + \alpha_t], \quad (121)$$

$$\lambda_{li} \cdot (\hat{y}_i - \hat{y}_{i+1} + n_{i+1} - n_i) = 0, \forall i \in [m-1], \quad (122)$$

$$\lambda_{ri} \cdot (\hat{y}_{i+1} - \hat{y}_i - N_{i+1} + N_i) = 0, \forall i \in [m-1], \quad (123)$$

$$\rho_1 \cdot ((1 - \beta)q_1 - \hat{y}_1) = 0, \quad (124)$$

$$\rho'_1 \cdot (\hat{y}_1 - (1 + \alpha)q_1) = 0, \quad (125)$$

$$\rho_m \cdot (\hat{y}_m - 1) = 0, \quad (126)$$

$$\boldsymbol{\lambda}_l, \boldsymbol{\lambda}_r \succeq \mathbf{0},$$

$$\rho_1, \rho'_1, \rho_m \geq 0. \quad (127)$$

Letting again  $\sigma_i \doteq \sum_{j=i}^m \omega_j(u_t^{-1}(\hat{y}_{tj}) - u_t^{-1}(\hat{y}_j))$  (for  $i = 1, 2, \dots, m$ ) and  $\hat{y}_0$  and  $q_0$  any identical reals, we obtain this time:

$$\sigma_i = \lambda_{ri-1} - \lambda_{li-1} + \rho_m, \forall i \in \{2, 3, \dots, m\}, \quad (128)$$

$$\sigma_1 = -\rho_1 + \rho'_1 + \rho_m. \quad (129)$$

We now remark that just like in (66), we still get

$$(\sigma_i - \rho_m) \cdot ((\hat{y}_i - q_i) - (\hat{y}_{(i-1)} - q_{(i-1)})) \geq 0, \forall i > 1, \quad (130)$$

since the expression of the corresponding  $\sigma$ s does not change. The proof changes for  $\sigma_1$  as this time,

$$(\sigma_1 - \rho_m) \cdot ((\hat{y}_1 - q_1) - (\hat{y}_0 - q_0)) = (-\rho_1 + \rho'_1) \cdot (\hat{y}_1 - q_1), \quad (131)$$

and we have the following possibilities:

- suppose  $\rho_1 > 0$ . In this case, KKT condition (124) implies  $\hat{y}_1 = (1 - \beta_t)q_1$ , implying  $\hat{y}_1 - q_1 = -\beta_t q_1 \leq 0$ , and also  $\hat{y}_1 \neq (1 + \alpha_t)q_1$ , implying from KKT condition (125)  $\rho'_1 = 0$ , which gives us  $(-\rho_1 + \rho'_1) \cdot (\hat{y}_1 - q_1) = -\rho_1 \cdot (\hat{y}_1 - q_1) \geq 0$ .
- suppose  $\rho'_1 > 0$ . In this case, the KKT condition (125) implies  $\hat{y}_1 = (1 + \alpha)q_1$  and so  $\hat{y}_1 - q_1 = \alpha q_1 \geq 0$ , but also so  $\hat{y}_1 \neq (1 - \beta)q_1$ , so  $\rho_1 = 0$ , which gives us  $(-\rho_1 + \rho'_1) \cdot (\hat{y}_1 - q_1) = \rho'_1 \cdot (\hat{y}_1 - q_1) \geq 0$ .
- If both  $\rho_1 = \rho'_1 = 0$ , we note  $(-\rho_1 + \rho'_1) \cdot (\hat{y}_1 - q_1) = 0$ ,

and so (66) also holds for  $i = 1$ , which allows us to conclude in the same way as we did for Lemma F, and ends the proof of Lemma I. ■

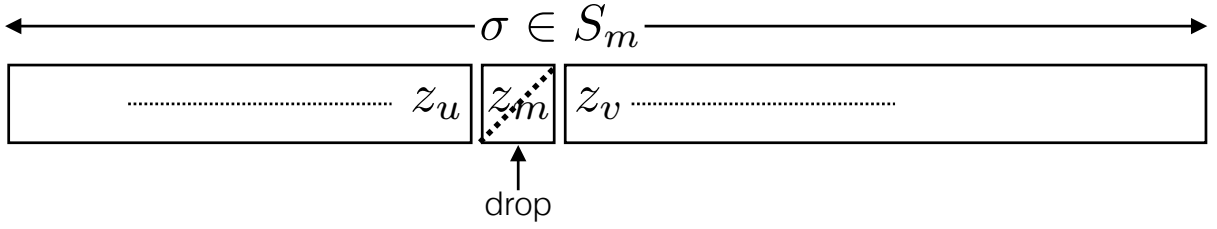

Figure 1: Crafting from  $\sigma \in S_m$  a subset of  $m - 1$  reals for which the induction hypothesis can be applied in the proof of Lemma 7 (see text).

## VI Proof of Lemma 7

Let us drop the iteration index, thus letting  $z_i \doteq z_{T_i}$  for  $i = 0, 1, \dots, m + 1$  (with  $z_0 \doteq z_{T_{\min}}$  and  $z_{m+1} \doteq z_{T_{\max}}$ ). We thus have  $z_i \leq z_{i+1}, \forall i$ . We now pick one specific element in  $\mathcal{U}(w, S)$ , such that

$$u(z_i) = (-\underline{L}')^{-1}(z_i), \quad (132)$$

for  $i \in [d]$ , which complies with the definition of  $\mathcal{U}$  as both  $u$  and  $(-\underline{L}')^{-1}$  are non decreasing. We then have

$$\begin{aligned} \int_{z_1}^{z_m} |(-\underline{L}')^{-1}(z) - u(z)| dz &= \sum_{i=1}^{m-1} \int_{z_i}^{z_{i+1}} |(-\underline{L}')^{-1}(z) - u(z)| dz \\ &\leq \sum_{i=1}^{m-1} (u(z_{i+1}) - u(z_i))(z_{i+1} - z_i) \\ &\leq N \sum_{i=1}^{m-1} (z_{i+1} - z_i)^2, \end{aligned} \quad (133)$$

where the first inequality holds because of (132) and  $u$  is non decreasing, and the second inequality holds because of the constraint in Step 3. Let  $S_m \ni \sigma : [m] \rightarrow [m]$  be a permutation of the indices. We now show

$$\sum_{i=1}^{m-1} (z_{\sigma(i+1)} - z_{\sigma(i)})^2 \geq \sum_{i=1}^{m-1} (z_{i+1} - z_i)^2, \forall m > 1, \forall \sigma \in S_m. \quad (134)$$

We show this by induction on  $m$ . The result is trivially true for  $m = 2$ . Considering any  $m > 2$  and any permutation  $\sigma \in S_m$ , suppose the order of the  $z$ s in the permutation is as in Figure 1. Let  $\Sigma_{\text{tot}} \doteq \sum_{i=1}^{m-1} (z_{\sigma(i+1)} - z_{\sigma(i)})^2$ , which therefore includes term  $(z_m - z_u)^2 + (z_v - z_m)^2$ . Now, drop  $z_m$ . This gives us a partial sum,  $\Sigma_{\text{partial}}$ , over  $\{z_1, z_2, \dots, z_{m-1}\}$  described by a permutation  $\sigma \in S_{m-1}$  for which the induction hypothesis applies. We then have two cases:

**Case 1:**  $1 < \sigma(m) < m$ , which implies that  $z_m$  is "inside" the ordering given by  $\sigma$  and is in fact the case depicted in Figure 1. In this case and using notations from Figure 1, we get:

$$\Sigma_{\text{tot}} = \Sigma_{\text{partial}} + (z_m - z_u)^2 + (z_v - z_m)^2 - (z_v - z_u)^2, \quad (135)$$

and the induction hypothesis yields

$$\Sigma_{\text{partial}} \geq \sum_{i=1}^{m-2} (z_{i+1} - z_i)^2. \quad (136)$$

So to show (134) we just need to show

$$\underbrace{\sum_{i=1}^{m-2} (z_{i+1} - z_i)^2 + (z_m - z_u)^2 + (z_v - z_m)^2 - (z_v - z_u)^2}_{\text{Lowerbound on } \Sigma_{\text{tot}} \text{ from (135) and (140)}} \geq \sum_{i=1}^{m-1} (z_{i+1} - z_i)^2, \quad (137)$$

which equivalently gives

$$(z_m - z_u)^2 + (z_m - z_v)^2 \geq (z_v - z_u)^2 + (z_m - z_{m-1})^2. \quad (138)$$

After putting  $(z_v - z_u)^2$  in the LHS and simplifying, we get equivalently that the induction holds if

$$2z_m^2 - 2z_m z_u - 2z_m z_v + 2z_v z_u \geq (z_m - z_{m-1})^2. \quad (139)$$

The LHS factorizes conveniently as  $2z_m^2 - 2z_m z_u - 2z_m z_v + 2z_v z_u = 2(z_m - z_u)(z_m - z_v)$ . Since by hypothesis  $z_1 \leq z_2 \dots \leq z_{m-1} \leq z_m$ , we get  $2(z_m - z_u)(z_m - z_v) \geq 2(z_m - z_{m-1})^2$ , which implies (139) holds and the induction is proven.

**Case 2:**  $\sigma(m) = m$  (the case  $\sigma(m) = 1$  give the same proof). In this case,  $z_m$  is at the "right" of the permutation's ordering. Using notations from Figure 1, we get in lieu of (135),

$$\Sigma_{\text{tot}} = \Sigma_{\text{partial}} + (z_m - z_u)^2, \quad (140)$$

and leaves us with the following result to show:

$$\sum_{i=1}^{m-2} (z_{i+1} - z_i)^2 + (z_m - z_u)^2 \geq \sum_{i=1}^{m-1} (z_{i+1} - z_i)^2, \quad (141)$$

which simplifies in  $(z_m - z_u)^2 \geq (z_m - z_{m-1})^2$ , which is true by assumption ( $z_u \leq z_{m-1} \leq z_m$ ).

To summarize, we have shown that  $\forall \sigma : [m] \rightarrow [m]$ ,

$$\int_{z_1}^{z_m} |(-\underline{L}')^{-1}(z) - u(z)| dz \leq \sum_{i=1}^{m-1} (z_{\sigma(i+1)} - z_{\sigma(i)})^2. \quad (142)$$

Assuming the  $\varepsilon$ -NN graph is 2-vertex-connected, we square the graph. Because of the triangle inequality on norm  $\|\cdot\|$ , every edge has now length at most  $2\varepsilon$  and the graph is Hamiltonian, a result known as Fleischner's Theorem (Fleischner, 1974), (Gross & Yellen, 2004, p. 265, F17). Consider any Hamiltonian path and the permutation  $\sigma$  of  $[m]$  it induces. We thus get  $\|\mathbf{x}_{\sigma(i+1)} - \mathbf{x}_{\sigma(i)}\| \leq 2\varepsilon, \forall i$ , and so Cauchy-Schwarz inequality yields:

$$\begin{aligned} \sum_{i=1}^{m-1} (z_{\sigma(i+1)} - z_{\sigma(i)})^2 &\doteq \sum_{i=1}^{m-1} (\mathbf{w}^\top \mathbf{x}_{\sigma(i+1)} - \mathbf{w}^\top \mathbf{x}_{\sigma(i)})^2 \\ &\leq \|\mathbf{w}\|_*^2 \sum_{i=1}^{m-1} \|\mathbf{x}_{\sigma(i+1)} - \mathbf{x}_{\sigma(i)}\|^2 \\ &\leq 2m\varepsilon^2 \cdot \|\mathbf{w}\|_*^2, \end{aligned} \quad (143)$$

as claimed, where  $\|\cdot\|_*$  is the dual norm of  $\|\cdot\|$ . We assemble (133) and (143) and get:

$$\int_{z_1}^{z_m} |(-\underline{L}')^{-1}(z) - u(z)| dz \leq 2Nm\varepsilon^2 \cdot \|\mathbf{w}\|_*^2,$$

which is the statement of the Lemma.

**Remark:** had we measured the  $\ell_1$  discrepancy using the loss and not its link (and adding a second order differentiability condition), we could have used the fact that a Bregman divergence between two points is proportional to the square loss to get a result similar to the Lemma (see Section II).

## References

- Banerjee, A., Merugu, S., Dhillon, I., and Ghosh, J. Clustering with bregman divergences. In *Proc. of the 4<sup>th</sup> SIAM International Conference on Data Mining*, pp. 234–245, 2004.
- Boissonnat, J.-D., Nielsen, F., and Nock, R. Bregman voronoi diagrams. *DCG*, 44(2):281–307, 2010.
- Boyd, S. and Vandenberghe, L. *Convex optimization*. Cambridge University Press, 2004.
- Buja, A., Stuetzle, W., and Shen, Y. Loss functions for binary class probability estimation and classification: structure and applications, 2005. Technical Report, University of Pennsylvania.
- Fleischner, H. The square of every two-connected graph is Hamiltonian. *Journal of Combinatorial Theory, Series B*, 16:29–34, 1974.
- Gross, J.-L. and Yellen, J. *Handbook of graph theory*. CRC press, 2004. ISBN 1-58488-090-2.
- Kakade, S., Kalai, A.-T., Kanade, V., and Shamir, O. Efficient learning of generalized linear and single index models with isotonic regression. In *NIPS\*24*, pp. 927–935, 2011.
- Nock, R. and Nielsen, F. On the efficient minimization of classification-calibrated surrogates. In *NIPS\*21*, pp. 1201–1208, 2008.
- Nock, R. and Nielsen, F. Bregman divergences and surrogates for learning. *IEEE Trans.PAMI*, 31: 2048–2059, 2009.
- Nock, R., Luosto, P., and Kivinen, J. Mixed Bregman clustering with approximation guarantees. In *Proc. of the 19<sup>th</sup> ECML*, pp. 154–169, 2008.
- Nock, R., Menon, A.-K., and Ong, C.-S. A scaled Bregman theorem with applications. In *NIPS\*29*, pp. 19–27, 2016.
- Reid, M.-D. and Williamson, R.-C. Composite binary losses. *JMLR*, 11:2387–2422, 2010.
- Shuford, E., Albert, A., and Massengil, H.-E. Admissible probability measurement procedures. *Psychometrika*, pp. 125–145, 1966.
